# Supplementary material for: The good, the bad and the twisted: a survey of ligand geometry in protein crystal structures
Source: PubMed Central journal article supplement — J Comput Aided Mol Des. 2012 Jan 14;26(2):169–83. doi: 10.1007/s10822-011-9538-6 (PMC3292722; doi:10.1007/s10822-011-9538-6), 2012-01-14
Supplement: 10822_2011_9538_MOESM1_ESM.pdf [file 10822_2011_9538_MOESM1_ESM.pdf]

## Protein-ligand Structures

pre 2000

| pre 2000 |         |        | 2006 |         |        | 2009 |         |        |
|----------|---------|--------|------|---------|--------|------|---------|--------|
| OK       | Strain? | Quest. | OK   | Strain? | Quest. | OK   | Strain? | Quest. |
| 1a3k     | 12as    | 1a1a   | 1zua | 2b00    | 2ank   | 3dj6 | 3gwf    | 3dp3   |
| 1a3l     | 13pk    | 1a29   | 2azy | 2b03    | 2d7i   | 3gl6 | 3h4v    | 2wid   |
| 1a4l     | 1a2c    | 1a3b   | 2azz | 2b60    | 2dou   | 2wf1 | 3dcj    | 3gxt   |
| 1a4m     | 1a2n    | 1a3e   | 2b0w | 2d4v    | 2dvb   | 3gxp | 2v40    | 3dj4   |
| 1a4q     | 1a37    | 1a4k   | 2cn0 | 2d32    | 2exc   | 3h5z | 3etl    | 3d73   |
| 1a5v     | 1a46    | 1a6v   | 2d7r | 2dvg    | 2f12   | 2v50 | 3d15    | 2vk2   |
| 1a6w     | 1a3g    | 1a7t   | 2dtw | 2evd    | 2gqg   | 3h30 | 3ha7    | 3e4a   |
| 1a7c     | 1a3r    | 1a8a   | 2dty | 2evs    | 2hwh   | 3g5r | 3gqk    | 3fnt   |
| 1a7x     | 1a3w    | 1a8g   | 2dv9 | 2f4d    | 2ie3   | 3e0i | 3d2i    | 3gcd   |
| 1a8i     | 1a42    | 1a8j   | 2ewy | 2f13    | 2ij7   | 3g2p | 3hbb    | 3ff6   |
| 1a28     | 1a4w    | 1a9b   | 2f10 | 2fgu    | 2itm   | 3eta | 2z xu   | 3ehn   |
| 1a78     | 1a50    | 1a9m   | 2flh | 2h8h    | 2b1g   | 2whl | 3fug    | 2w6u   |
| 1aax     | 1a53    | 1a9u   | 2fo4 | 2hwn    | 2f11   | 3da9 | 3fwa    | 3f nu  |
| 1acm     | 1a5i    | 1a25   | 2hdq | 2ie4    | 2fgv   | 2znu | 3hhe    | 3cxi   |
| 1ad8     | 1a82    | 1a4h   | 2hdr | 2irz    | 2grb   | 3dtx | 2znq    | 3h06   |
| 1ah3     | 1a8b    | 1a5h   | 2hwi | 2is0    | 2j4z   | 3dp2 | 3egt    | 3g5n   |
| 1ahi     | 1a8u    | 1a27   | 2iko | 2j7t    | 2j9h   | 3d5i | 3d3p    | 2w6q   |
| 1aib     | 1a1m    | 1aa1   | 2ine | 2j30    | 2c2z   | 2w6n | 3dyf    | 3fhg   |
| 1b3f     | 1a9x    | 1aaq   | 2inz | 2npf    | 2hoc   | 3ehy | 2wit    | 2wfg   |
| 1b4b     | 1a85    | 1ab9   | 2iw4 | 2nv6    | 2c4f   | 3en3 | 3fzn    | 3gxy   |
| 1b4d     | 1ae8    | 1abj   | 2j7x | 2dva    | 2h7m   | 3ft5 | 3d5m    | 3h03   |
| 1b59     | 1aec    | 1ai8   | 2j7y | 2ev1    | 2hxz   | 3efq | 3dj7    |        |
| 101m     | 1af0    | 1an5   | 2j32 | 2f3k    | 2c5h   | 2w70 | 3g42    |        |
| 1c0l     | 1afe    | 1b12   | 2j90 | 2npm    | 2cl2   | 3a1l | 3gga    |        |
| 1c0t     | 1aht    | 1b74   | 2c7v | 2fz8    |        | 3gbe | 3dsz    |        |
| 1c14     | 1ahy    | 1a4g   | 2hs1 | 2j2u    |        | 3fw9 | 2w77    |        |
|          | 1ajs    | 1a69   | 2fzb | 2gpu    |        | 3dj5 | 2znp    |        |
|          | 1b0h    | 1ajn   | 2ho7 | 2i0h    |        | 3vf  | 3gxf    |        |
|          | 1b1h    | 1b25   | 2cet | 2ipx    |        | 3g93 | 3doz    |        |
|          | 1b2h    |        | 2ceq | 2a9j    |        | 3eig | 2znn    |        |
|          | 1b2y    |        | 2d23 | 2i1r    |        | 2wez | 3fxb    |        |
|          | 1b33    |        | 2hd6 | 2f7a    |        | 2znt | 2whm    |        |
|          | 1b3d    |        | 2hg8 | 2d5w    |        | 3h4g | 3gww    |        |
|          | 1b3n    |        | 2ibn | 2f38    |        | 2zvc | 3g2o    |        |
|          | 1b57    |        | 2iyr | 2bdf    |        | 3fvu | 3ggx    |        |
|          | 1a8t    |        | 2iyz | 2bdj    |        | 2wf3 | 3ha5    |        |
|          | 1a30    |        | 2hcj | 2j74    |        | 2whr | 3fys    |        |
|          | 1a38    |        | 2i19 | 2d20    |        | 3fhq | 3h72    |        |
|          | 1a95    |        | 2j7e |         |        | 3gh8 | 3cmp    |        |
|          | 1acl    |        | 2ics |         |        | 2zno |         |        |
|          | 1afq    |        | 2j0f |         |        | 3d28 |         |        |
|          | 1b0o    |        | 2bvr |         |        | 2w71 |         |        |
|          | 13gs    |        | 2bvx |         |        |      |         |        |
|          | 1c12    |        |      |         |        |      |         |        |

---

Tot. 26 44 31 43 38 24 42 39 21
